# Supplementary material
Source: PubMed Central journal article supplement (PMC4786017)
Supplement: NIHMS754188-supplement-Supporting_Info.pdf [file NIHMS754188-supplement-Supporting_Info.pdf]

## **Supporting Information**

### **Effect-Directed Analysis of Human Peroxisome Proliferator-Activated Nuclear Receptors (PPAR $\gamma$ 1) ligands in Indoor Dust**

Mingliang Fang, Thomas F. Webster and Heather M. Stapleton\*

\*corresponding author: [heather.stapleton@duke.edu](mailto:heather.stapleton@duke.edu)

#### **CONTENTS**

|                                                                                                                                                                                                              |          |
|--------------------------------------------------------------------------------------------------------------------------------------------------------------------------------------------------------------|----------|
| Text S1, Chemical Identification.                                                                                                                                                                            | Page S3  |
| Table S1. Elution profile of prepared standard mixtures in the NP-HPLC                                                                                                                                       | Page S4  |
| Table S2. Quantifier and qualifiers of several FAs, phthalates, and organophosphates analyzed using GC/EI-MS.                                                                                                | Page S5  |
| Table S3. Compounds identified in PPAR $\gamma$ active fractions from Dust I, II and III.                                                                                                                    | Page S6  |
| Table S4. Concentration ( $\mu\text{g/g}$ dust) of several organophosphates, phthalates and FAs in the 25 house dust extracts cleaned by GPC.                                                                | Page S7  |
| Table S5. Concentration ( $\mu\text{g/g}$ dust) of several organophosphates, phthalates and FAs in the 10 raw house dust extracts.                                                                           | Page S8  |
| Table S6. Pearson Correlation Analysis between the concentration of several organophosphates, phthalates and FAs with PPAR $\gamma$ activation potency in 25 dust extracts at 6 different doses.             | Page S9  |
| Table S7. Pearson Correlation Analysis between the concentration of several organophosphates, phthalates and fatty acids with PPAR $\gamma$ activation potency in 10 raw dust extracts at 3 different doses. | Page S10 |
| Table S8. Concentration ( $\mu\text{g/g}$ dust) of four FAs in cat hair, dog hair, human hair, human skin debris, fish liver oil, and two vegetable oil.                                                     | Page S11 |
| Figure S1. Full scan of PPAR $\gamma$ active fraction and the identified chemicals in Dust I extract using GC-MS/EI.                                                                                         | Page S12 |
| Figure S2. Full scan of PPAR $\gamma$ active fraction and the identified chemicals in Dust II using GC-MS/EI.                                                                                                | Page S13 |

Figure S3. Full scan of PPAR $\gamma$  active fraction and the identified chemicals in the D2 dust extract using GC-MS/EI. Page S14

Figure S4. Linear correlation between the PPAR $\gamma$  activation (%) at the dose of 200  $\mu$ g DEQ/mL and the concentration of (a) OA, (b) PA, (c) SA, and (d) MA in 10 raw dust extracts. Page S15

Figure S5. The contribution (%) of OA, PA, SA, and MA to the sum of the FAs in 35 house dust extracts and several possible sources. Page S16

Figure S6. PPAR $\gamma$  Activation (%) of three dust extracts ( $\sim$ 606  $\mu$ g DEQ/mL) and the mock mixture which contained the equivalent concentration of OA, PA, SA, and MA. Page S17

**Text S1, Chemical Identification.** Fractions with significant PPAR $\gamma$  activity were subjected to qualitative mass spectrometric analysis by gas chromatography mass spectrometry (Agilent GC 6890N, MS 5975, Newark, DE) operated in full-scan mode ( $m/z$  50 to 1050) under the electron ionization (EI) mode (GC/EI-MS). The chemical identification was based on our previous study (Fang et al. 2014a) and fully described in Supplemental Material, Chemical Identification. A 0.25 mm (i.d.)  $\times$  15 m fused silica capillary column coated with 5% phenyl methylpolysiloxane (0.25  $\mu$ m film thickness) was used for separation of the analytes. Splitless injections were performed with a PTV inlet maintained at 250°C and 10 psi. The nitrogen flow rate was 1.3 mL min<sup>-1</sup> and the oven temperature program was as follows: after holding at 40°C for 0.6 min, the temperature was increased at 10°C/min until reaching 280°C, at which point isothermal conditions were maintained for 14 min before returning to initial conditions. The transfer line temperature was maintained at 280°C, and the ion source was held at 230°C. Structural elucidation was performed using MS-Chemstation software (version E.02.01.1177) from Agilent (Palo Alto, CA 94306 United States) equipped with the NIST mass spectral library (version 2005) and NIST Mass Spectral Search Program (Version 2.0d). The mass spectrum of each non-targeted component was extracted and its peaks assigned identities by the automated mass spectral deconvolution and identification system (AMDIS) and the NIST-05-library. Peaks with a signal-to-noise ratio (S/N) above 20 were library searched and assigned structures based on the presence of a corresponding mass signature with a match factor of at least 60 (out of 100). For several tentatively identified chemicals, further confirmation was achieved by comparing retention times (RT) and mass spectral to those of authentic standards.

**Table S1. Elution profile of prepared standard mixtures in the NP-HPLC**

|                  |   |   |   |   |   |   |    |    |    |    |    |    |    |    |    |    |    |    |    |    |    |    |    |  |  |  |  |  |  |  |  |
|------------------|---|---|---|---|---|---|----|----|----|----|----|----|----|----|----|----|----|----|----|----|----|----|----|--|--|--|--|--|--|--|--|
| DEHP             |   |   |   |   |   |   |    |    |    |    |    |    |    |    |    |    |    |    |    |    |    |    |    |  |  |  |  |  |  |  |  |
| TBB              |   |   |   |   |   |   |    |    |    |    |    |    |    |    |    |    |    |    |    |    |    |    |    |  |  |  |  |  |  |  |  |
| TBPH             |   |   |   |   |   |   |    |    |    |    |    |    |    |    |    |    |    |    |    |    |    |    |    |  |  |  |  |  |  |  |  |
| PBDEs            |   |   |   |   |   |   |    |    |    |    |    |    |    |    |    |    |    |    |    |    |    |    |    |  |  |  |  |  |  |  |  |
| TPP              |   |   |   |   |   |   |    |    |    |    |    |    |    |    |    |    |    |    |    |    |    |    |    |  |  |  |  |  |  |  |  |
| TCPP             |   |   |   |   |   |   |    |    |    |    |    |    |    |    |    |    |    |    |    |    |    |    |    |  |  |  |  |  |  |  |  |
| TCEP             |   |   |   |   |   |   |    |    |    |    |    |    |    |    |    |    |    |    |    |    |    |    |    |  |  |  |  |  |  |  |  |
| Triclosan        |   |   |   |   |   |   |    |    |    |    |    |    |    |    |    |    |    |    |    |    |    |    |    |  |  |  |  |  |  |  |  |
| 2,4,6-TBP        |   |   |   |   |   |   |    |    |    |    |    |    |    |    |    |    |    |    |    |    |    |    |    |  |  |  |  |  |  |  |  |
| 2,4,5-TBP        |   |   |   |   |   |   |    |    |    |    |    |    |    |    |    |    |    |    |    |    |    |    |    |  |  |  |  |  |  |  |  |
| TBBPA            |   |   |   |   |   |   |    |    |    |    |    |    |    |    |    |    |    |    |    |    |    |    |    |  |  |  |  |  |  |  |  |
| 6-OH-BDE47       |   |   |   |   |   |   |    |    |    |    |    |    |    |    |    |    |    |    |    |    |    |    |    |  |  |  |  |  |  |  |  |
| Monochlorophenyl |   |   |   |   |   |   |    |    |    |    |    |    |    |    |    |    |    |    |    |    |    |    |    |  |  |  |  |  |  |  |  |
| BPA              |   |   |   |   |   |   |    |    |    |    |    |    |    |    |    |    |    |    |    |    |    |    |    |  |  |  |  |  |  |  |  |
| TBMEHP           |   |   |   |   |   |   |    |    |    |    |    |    |    |    |    |    |    |    |    |    |    |    |    |  |  |  |  |  |  |  |  |
| TBBA             |   |   |   |   |   |   |    |    |    |    |    |    |    |    |    |    |    |    |    |    |    |    |    |  |  |  |  |  |  |  |  |
| MEHP             |   |   |   |   |   |   |    |    |    |    |    |    |    |    |    |    |    |    |    |    |    |    |    |  |  |  |  |  |  |  |  |
| TPT chloride     |   |   |   |   |   |   |    |    |    |    |    |    |    |    |    |    |    |    |    |    |    |    |    |  |  |  |  |  |  |  |  |
| TBT chloride     |   |   |   |   |   |   |    |    |    |    |    |    |    |    |    |    |    |    |    |    |    |    |    |  |  |  |  |  |  |  |  |
| RT (min)         | 4 | 5 | 6 | 7 | 8 | 9 | 10 | 11 | 12 | 13 | 14 | 15 | 16 | 17 | 18 | 19 | 20 | 21 | 22 | 23 | 24 | 25 | 26 |  |  |  |  |  |  |  |  |

**Table 1 (Continued)**

|                  |    |    |    |    |    |    |    |    |    |    |    |    |    |    |    |    |    |    |    |    |    |  |  |  |  |  |  |  |  |  |  |
|------------------|----|----|----|----|----|----|----|----|----|----|----|----|----|----|----|----|----|----|----|----|----|--|--|--|--|--|--|--|--|--|--|
| DEHP             |    |    |    |    |    |    |    |    |    |    |    |    |    |    |    |    |    |    |    |    |    |  |  |  |  |  |  |  |  |  |  |
| TBB              |    |    |    |    |    |    |    |    |    |    |    |    |    |    |    |    |    |    |    |    |    |  |  |  |  |  |  |  |  |  |  |
| TBPH             |    |    |    |    |    |    |    |    |    |    |    |    |    |    |    |    |    |    |    |    |    |  |  |  |  |  |  |  |  |  |  |
| PBDEs            |    |    |    |    |    |    |    |    |    |    |    |    |    |    |    |    |    |    |    |    |    |  |  |  |  |  |  |  |  |  |  |
| TPP              |    |    |    |    |    |    |    |    |    |    |    |    |    |    |    |    |    |    |    |    |    |  |  |  |  |  |  |  |  |  |  |
| TCPP             |    |    |    |    |    |    |    |    |    |    |    |    |    |    |    |    |    |    |    |    |    |  |  |  |  |  |  |  |  |  |  |
| TCEP             |    |    |    |    |    |    |    |    |    |    |    |    |    |    |    |    |    |    |    |    |    |  |  |  |  |  |  |  |  |  |  |
| Triclosan        |    |    |    |    |    |    |    |    |    |    |    |    |    |    |    |    |    |    |    |    |    |  |  |  |  |  |  |  |  |  |  |
| 2,4,6-TBP        |    |    |    |    |    |    |    |    |    |    |    |    |    |    |    |    |    |    |    |    |    |  |  |  |  |  |  |  |  |  |  |
| 2,4,5-TBP        |    |    |    |    |    |    |    |    |    |    |    |    |    |    |    |    |    |    |    |    |    |  |  |  |  |  |  |  |  |  |  |
| TBBPA            |    |    |    |    |    |    |    |    |    |    |    |    |    |    |    |    |    |    |    |    |    |  |  |  |  |  |  |  |  |  |  |
| 6-OH-BDE47       |    |    |    |    |    |    |    |    |    |    |    |    |    |    |    |    |    |    |    |    |    |  |  |  |  |  |  |  |  |  |  |
| Monochlorophenyl |    |    |    |    |    |    |    |    |    |    |    |    |    |    |    |    |    |    |    |    |    |  |  |  |  |  |  |  |  |  |  |
| BPA              |    |    |    |    |    |    |    |    |    |    |    |    |    |    |    |    |    |    |    |    |    |  |  |  |  |  |  |  |  |  |  |
| TBMEHP           |    |    |    |    |    |    |    |    |    |    |    |    |    |    |    |    |    |    |    |    |    |  |  |  |  |  |  |  |  |  |  |
| TBBA             |    |    |    |    |    |    |    |    |    |    |    |    |    |    |    |    |    |    |    |    |    |  |  |  |  |  |  |  |  |  |  |
| MEHP             |    |    |    |    |    |    |    |    |    |    |    |    |    |    |    |    |    |    |    |    |    |  |  |  |  |  |  |  |  |  |  |
| TPT chloride     |    |    |    |    |    |    |    |    |    |    |    |    |    |    |    |    |    |    |    |    |    |  |  |  |  |  |  |  |  |  |  |
| TBT chloride     |    |    |    |    |    |    |    |    |    |    |    |    |    |    |    |    |    |    |    |    |    |  |  |  |  |  |  |  |  |  |  |
| RT (min)         | 30 | 31 | 32 | 33 | 34 | 35 | 36 | 37 | 38 | 39 | 40 | 41 | 42 | 43 | 44 | 45 | 46 | 47 | 48 | 49 | 50 |  |  |  |  |  |  |  |  |  |  |

**Table S2. Quantifier and qualifiers of several FAs, phthalates, and organophosphates analyzed using GC/EI-MS.**

|                  | Compounds | Quantifier | Qualifier 1 | Qualifier 2 | RT (min) |
|------------------|-----------|------------|-------------|-------------|----------|
| Fatty Acid       | OA        | 264        | 284         |             | 12.3     |
|                  | PA        | 256        | 213         | 129         | 11.0     |
|                  | 31D-PA    | 287        | 237         | 141         | 10.8     |
|                  | SA        | 284        | 241         | 129         | 12.4     |
|                  | MA        | 228        | 185         | 129         | 9.9      |
| Phthalates       | DMP       | 163        | 77          | 194         | 7.8      |
|                  | DEP       | 149        | 177         | 222         | 8.8      |
|                  | dDEP      | 153        | 181         | 226         |          |
|                  | DBP       | 149        | 205         | 223         | 11.0     |
|                  | d-DBP     | 153        | 209         | 227         |          |
|                  | DiBP      | 149        | 205         | 223         | 10.5     |
|                  | BBP       | 149        | 91          | 206         | 14.1     |
|                  | d-BBP     | 153        | 210         | 91          |          |
|                  | DEHP      | 149        | 167         | 279         | 16.3     |
|                  | dDEHP     | 153        | 171         | 283         |          |
| DiNP             | 293       | 149        | 127         | 19.5        |          |
| Organophosphates | TBP       | 99         | 155         | 211         | 9.1      |
|                  | d-TBP     | 103        | 167         | 231         |          |
|                  | TPP       | 325        | 326         |             | 14.8     |
|                  | d-TPP     | 341        | 340         |             |          |

**Table S3. Compounds identified in PPAR $\gamma$  active fractions from Dust I, II and III (confirmed with standards or with a match factor more than 50%)**

| Numbers | Compound identified                  | Abbreviation | CAS number | Identified by | Match Factor |
|---------|--------------------------------------|--------------|------------|---------------|--------------|
| 1       | Arachidic acid                       | AA           | 506-30-9   | SM            | 70%          |
| 2       | Azelaic acid                         | AzA          | 123-99-9   | SM            | 60%          |
| 3       | Behenic acid                         | BA           | 112-85-6   | SM            | 90%          |
| 4       | Benzyl butyl phthalate               | BBP          | 85-68-7    | AS            |              |
| 5       | Bis(2-ethylhexyl) fumarate           | BEHF         | 141-02-6   | AS            |              |
| 6       | Bis(2-ethylhexyl) phthalate          | DEHP         | 117-81-7   | AS            |              |
| 7       | Dibutyl phthalate                    | DBP          | 84-74-2    | AS            |              |
| 8       | Diethyl phthalate                    | DEP          | 84-66-2    | AS            |              |
| 9       | Diisononyl phthalate                 | DiNP         | 28553-12-0 | AS            |              |
| 10      | Docosahexaenoic acid                 | DHA          | 6217-54-5  | SM            | 74%          |
| 11      | Hexadecanamide                       | HDM          | 629-54-9   | SM            | 60%          |
| 12      | Lauric acid                          | LA           | 143-07-7   | SM            | 90%          |
| 13      | Myristic acid                        | MA           | 544-63-8   | AS            |              |
| 14      | Octadecanamide                       | ODM          | 124-26-5   | SM            | 61%          |
| 15      | Oleamide                             | OM           | 301-02-0   | SM            | 50%          |
| 16      | Oleic Acid                           | OA           | 112-80-1   | AS            |              |
| 17      | Palmitoleic acid                     | POA          | 373-49-9   | SM            | 90%          |
| 18      | Palmitic acid                        | PA           | 57-10-3    | AS            |              |
| 19      | Pentadecanoic acid                   | PDA          | 1002-84-2  | SM            | 90%          |
| 20      | Piperine                             | PP           | 94-62-2    | SM            | 91%          |
| 21      | Stearic acid                         | SA           | 57-11-4    | AS            |              |
| 22      | Triphenyl phosphate                  | TPP          | 115-86-6   | AS            |              |
| 23      | Tris(1,3-dichloro-2-propyl)phosphate | TDCPP        | 13674-87-8 | AS            |              |
| 24      | Tris-(2-butoxyethyl)-phosphate       | TBEP         | 78-51-3    | AS            |              |

AS=authentic standard; SM=spectral match (these compounds were identified by match to spectra in the National Institute of Standards and Technology's 2005 spectral library with a match factor > 50%).

**Table S4. Concentration ( $\mu\text{g/g}$  dust) of several organophosphates, phthalates and FAs in the 25 house dust extracts cleaned by GPC.**

| Sample ID | Concentration ( $\mu\text{g/g}$ dust) |       |        |        |       |         |        |       |      |         |         |         |        |
|-----------|---------------------------------------|-------|--------|--------|-------|---------|--------|-------|------|---------|---------|---------|--------|
|           | TBP                                   | DiBP  | DBP    | BBP    | TPP   | DEHP    | DiNP   | DEP   | DMP  | OA      | PA      | SA      | MA     |
| A-1       | 0.43                                  | 12.06 | 15.55  | 11.20  | 1.17  | 250.26  | 127.55 | 1.55  | 0.34 | 1549.97 | 1320.50 | 324.66  | 462.53 |
| A-2       | 0.59                                  | 4.49  | 11.72  | 9.21   | 0.71  | 72.26   | 107.47 | 2.21  | 0.14 | 3731.56 | 1610.53 | 419.71  | 275.61 |
| A-3       | 0.29                                  | 0.23  | 1.98   | 0.36   | 0.11  | 1.98    | 0.00   | 1.48  | NA   | 425.46  | 113.68  | 25.32   | 51.42  |
| A-4       | 0.34                                  | 7.20  | 16.52  | 54.27  | 2.03  | 338.46  | 105.65 | 3.60  | 0.43 | 1253.57 | 4150.54 | 1780.95 | 832.17 |
| A-5       | 0.79                                  | 24.68 | 17.71  | 68.74  | 1.10  | 284.31  | 202.13 | 4.37  | NA   | 2554.66 | 3501.86 | 988.83  | 695.86 |
| A-6       | 0.68                                  | 12.53 | 31.93  | 31.82  | 2.45  | 103.50  | 87.69  | 10.94 | 0.43 | 1164.23 | 1824.89 | 708.66  | 269.07 |
| A-7       | 0.40                                  | 17.05 | 7.61   | 7.86   | 0.42  | 115.68  | 59.60  | 1.24  | NA   | 429.27  | 485.66  | 164.88  | 101.23 |
| B-1       | 0.48                                  | 10.33 | 275.95 | 17.36  | 2.04  | 2029.78 | 129.41 | 18.33 | NA   | 0.00    | 15.91   | 7.70    | 3.89   |
| B-2       | 0.45                                  | 38.51 | 236.15 | 33.60  | 6.78  | 1236.48 | 238.10 | 14.45 | 0.34 | 55.74   | 316.40  | 129.60  | 65.63  |
| B-3       | 0.81                                  | 9.28  | 284.41 | 149.22 | 60.67 | 657.94  | 81.04  | 20.54 | 0.22 | 6.34    | 98.18   | 44.88   | 23.87  |
| C-1       | 0.64                                  | 38.39 | 154.91 | 11.51  | 1.23  | 100.94  | 129.57 | 16.65 | NA   | 1103.75 | 1560.99 | 439.08  | 310.01 |
| C-2       | 1.02                                  | 20.66 | 136.16 | 181.11 | 0.47  | 324.32  | 172.33 | 9.80  | NA   | 1274.46 | 3466.45 | 1038.95 | 531.43 |
| C-3       | 0.65                                  | 7.15  | 124.92 | 16.19  | 0.86  | 116.37  | 67.63  | 17.82 | NA   | 674.34  | 2463.82 | 819.62  | 304.23 |
| D-1       | 0.46                                  | 8.25  | 14.88  | 5.87   | 1.13  | 113.00  | 131.82 | 4.05  | NA   | 2192.43 | 3224.51 | 844.10  | 420.35 |
| D-2       | 0.00                                  | 8.93  | 28.84  | 15.43  | 1.26  | 88.83   | 134.54 | 6.46  | NA   | 2313.52 | 1981.21 | 616.44  | 387.80 |
| D-3       | 4.73                                  | 11.69 | 28.51  | 94.57  | 0.48  | 139.49  | 125.35 | 46.71 | NA   | 3160.36 | 2157.56 | 682.31  | 387.97 |
| D-4       | NA                                    | 4.05  | 13.36  | 6.07   | 0.19  | 191.71  | 117.36 | 11.24 | 0.19 | 2513.01 | 604.20  | 149.25  | 87.00  |
| D-5       | NA                                    | 3.71  | 27.58  | 16.06  | 1.01  | 113.50  | 121.10 | 2.01  | NA   | 2085.21 | 1408.77 | 449.81  | 364.05 |
| D-6       | 0.28                                  | 25.22 | 10.44  | 9.27   | 0.40  | 106.48  | 74.50  | 2.35  | NA   | 595.36  | 3248.12 | 1361.14 | 244.08 |
| E-1       | 1.39                                  | 3.02  | 20.28  | 18.52  | 0.78  | 99.46   | 148.84 | 3.03  | 0.74 | 648.35  | 195.55  | 61.85   | 49.68  |
| E-2       | 1.00                                  | 5.82  | 15.43  | 13.15  | 1.00  | 112.64  | 118.83 | 4.87  | NA   | 448.43  | 551.28  | 294.55  | 81.39  |
| E-3       | 1.39                                  | 2.07  | 15.42  | 7.20   | 0.43  | 63.71   | 34.14  | 2.56  | NA   | 191.86  | 187.30  | 62.59   | 33.09  |
| E-4       | 3.94                                  | 3.77  | 15.77  | 58.92  | 1.42  | 217.27  | 146.52 | 3.35  | NA   | 2071.82 | 843.07  | 283.19  | 200.86 |
| E-5       | 0.25                                  | 0.78  | 4.65   | 66.35  | 0.23  | 20.34   | 19.00  | 0.87  | 0.00 | 103.39  | 742.51  | 204.37  | 61.97  |
| SRM2585   | 0.94                                  | 0.48  | 3.75   | 2.72   | 0.10  | 3.49    | 0.00   | 3.86  | 1.60 | 78.66   | 82.69   | 7.55    | 39.64  |
| Median    | 0.64                                  | 8.25  | 16.52  | 16.06  | 1.00  | 113.50  | 118.83 | 4.05  | 0.34 | 1103.75 | 1320.50 | 324.66  | 244.08 |
| Max       | 4.73                                  | 38.51 | 284.41 | 181.11 | 60.67 | 2029.78 | 238.10 | 46.71 | 1.60 | 3731.56 | 4150.54 | 1780.95 | 832.17 |
| Min       | 0.00                                  | 0.23  | 1.98   | 0.36   | 0.10  | 1.98    | 0.00   | 0.87  | 0.00 | 0.00    | 15.91   | 7.55    | 3.89   |

**Table S5. Concentration ( $\mu\text{g/g}$  dust) of several organophosphates, phthalates and FAs in the 10 raw house dust extracts.**

| Sample ID | Concentration ( $\mu\text{g/g}$ dust) |       |       |        |      |        |        |       |         |         |         |        |
|-----------|---------------------------------------|-------|-------|--------|------|--------|--------|-------|---------|---------|---------|--------|
|           | TBP                                   | DiBP  | DBP   | BBP    | TPP  | DEHP   | DiNP   | DEP   | OA      | PA      | SA      | MA     |
| D-7       | 0.42                                  | 6.71  | 4.71  | 5.51   | 0.24 | 170.15 | 483.61 | 3.70  | 1807.49 | 1352.46 | 451.64  | 107.98 |
| D-8       | 0.48                                  | 7.05  | 11.57 | 115.51 | 0.52 | 226.65 | 183.47 | 3.88  | 7075.05 | 6485.11 | 1402.41 | 341.56 |
| D-9       | NA                                    | 7.15  | 5.79  | 13.34  | 0.95 | 89.28  | 61.14  | 7.95  | 874.26  | 161.37  | 19.92   | 25.60  |
| D-10      | 0.78                                  | 60.04 | 6.63  | 8.61   | 0.61 | 206.50 | 110.85 | 8.25  | 571.14  | 181.51  | 38.19   | 22.78  |
| D-11      | NA                                    | 10.55 | 12.24 | 30.05  | 1.83 | 198.16 | 150.09 | 41.54 | 957.67  | 1207.73 | 297.76  | 220.81 |
| E-6       | 2.93                                  | 4.29  | 9.08  | 6.73   | 1.46 | 315.88 | 85.53  | 6.30  | 512.47  | 1131.41 | 341.57  | 110.52 |
| E-7       | 1.42                                  | 3.14  | 20.83 | 126.58 | 0.49 | 83.75  | 205.45 | 4.95  | 1404.40 | 1158.66 | 185.69  | 118.82 |
| E-8       | 0.59                                  | 4.17  | 7.07  | 21.66  | 0.22 | 205.25 | 39.65  | 2.61  | 271.54  | 881.73  | 35.74   | 91.63  |
| E-9       | NA                                    | 2.76  | 8.23  | 41.36  | 0.87 | 41.87  | 48.78  | 7.26  | 1039.08 | 612.23  | 115.21  | 130.92 |
| E-10      | NA                                    | 1.37  | 10.33 | 5.65   | 0.42 | 29.47  | 28.38  | 5.80  | 146.94  | 435.70  | 107.81  | 136.07 |
| Median    | 0.68                                  | 5.50  | 8.65  | 17.50  | 0.56 | 184.15 | 98.19  | 6.05  | 915.97  | 1006.57 | 150.45  | 114.67 |
| Max       | 2.93                                  | 60.04 | 20.83 | 126.58 | 1.83 | 315.88 | 483.61 | 41.54 | 7075.05 | 6485.11 | 1402.41 | 341.56 |
| Min       | NA                                    | 1.37  | 4.71  | 5.51   | 0.22 | 29.47  | 28.38  | 2.61  | 146.94  | 161.37  | 19.92   | 22.78  |



**Table S6. Pearson Correlation Analysis between the concentration of several organophosphates, phthalates and FAs with PPAR $\gamma$  activation potency in 25 dust extracts at 6 different doses (Dose 1: 8  $\mu\text{g DEQ/mL}$ ; Dose 2: 25  $\mu\text{g DEQ/mL}$ ; Dose 3: 74  $\mu\text{g DEQ/mL}$ ; Dose 4: 222  $\mu\text{g DEQ/mL}$ ; Dose 5: 667  $\mu\text{g DEQ/mL}$ ; Dose 6: 2000  $\mu\text{g DEQ/mL}$ ). All the correlation with  $p < 0.05$  was marked in red.**

|        | Dose 5 | Dose 4 | Dose 3 | Dose 2 | Dose 1  | TBP     | DiBP    | DBP     | BBP     | TPP     | DEHP    | DiNP    | DEP    | DMP     | OA      | PA      | SA       | MA        |
|--------|--------|--------|--------|--------|---------|---------|---------|---------|---------|---------|---------|---------|--------|---------|---------|---------|----------|-----------|
| Dose 6 | 0.421  | 0.14   | -0.284 | -0.127 | -0.0574 | -0.403  | -0.318  | -0.537  | -0.0811 | -0.446  | -0.484  | -0.47   | -0.467 | -0.322  | -0.272  | -0.355  | -0.364   | -0.339    |
|        | 0.347  | 0.765  | 0.538  | 0.786  | 0.903   | 0.371   | 0.488   | 0.213   | 0.863   | 0.316   | 0.271   | 0.287   | 0.291  | 0.481   | 0.555   | 0.435   | 0.422    | 0.457     |
|        | 7      | 7      | 7      | 7      | 7       | 7       | 7       | 7       | 7       | 7       | 7       | 7       | 7      | 7       | 7       | 7       | 7        | 7         |
| Dose 5 |        | 0.698  | 0.176  | -0.273 | -0.107  | -0.0822 | 0.114   | -0.131  | -0.0628 | 0.108   | -0.0482 | 0.262   | 0.268  | -0.518  | 0.647   | 0.247   | 0.158    | 0.334     |
|        |        | 0.0006 | 0.459  | 0.244  | 0.654   | 0.73    | 0.632   | 0.583   | 0.793   | 0.651   | 0.84    | 0.264   | 0.254  | 0.0193  | 0.002   | 0.294   | 0.506    | 0.15      |
|        |        | 20     | 20     | 20     | 20      | 20      | 20      | 20      | 20      | 20      | 20      | 20      | 20     | 20      | 20      | 20      | 20       | 20        |
| Dose 4 |        |        | 0.587  | 0.214  | 0.0759  | -0.0178 | 0.0011  | -0.354  | 0.113   | -0.192  | -0.262  | 0.252   | 0.0436 | -0.293  | 0.743   | 0.666   | 0.571    | 0.732     |
|        |        |        | 0.0021 | 0.304  | 0.718   | 0.933   | 0.996   | 0.0824  | 0.589   | 0.358   | 0.206   | 0.225   | 0.836  | 0.155   | 2E-05   | 0.0003  | 0.00286  | 0.0000322 |
|        |        |        | 25     | 25     | 25      | 25      | 25      | 25      | 25      | 25      | 25      | 25      | 25     | 25      | 25      | 25      | 25       | 25        |
| Dose 3 |        |        |        | 0.614  | 0.469   | -0.137  | -0.188  | -0.457  | -0.0413 | -0.175  | -0.271  | -0.0339 | -0.305 | -0.0176 | 0.5     | 0.278   | 0.257    | 0.279     |
|        |        |        |        | 0.0011 | 0.0179  | 0.514   | 0.368   | 0.0216  | 0.844   | 0.404   | 0.19    | 0.872   | 0.139  | 0.934   | 0.0109  | 0.178   | 0.214    | 0.177     |
|        |        |        |        | 25     | 25      | 25      | 25      | 25      | 25      | 25      | 25      | 25      | 25     | 25      | 25      | 25      | 25       | 25        |
| Dose 2 |        |        |        |        | 0.77    | -0.0692 | -0.35   | -0.568  | -0.13   | -0.289  | -0.312  | -0.138  | -0.508 | -0.037  | 0.118   | -0.0297 | -0.0307  | -0.0298   |
|        |        |        |        |        | 7E-06   | 0.742   | 0.086   | 0.0031  | 0.534   | 0.161   | 0.129   | 0.509   | 0.0096 | 0.861   | 0.574   | 0.888   | 0.884    | 0.887     |
|        |        |        |        |        | 25      | 25      | 25      | 25      | 25      | 25      | 25      | 25      | 25     | 25      | 25      | 25      | 25       | 25        |
| Dose 1 |        |        |        |        |         | 0.071   | -0.339  | -0.351  | -0.126  | -0.0237 | -0.156  | -0.0436 | -0.213 | 0.0785  | 0.0793  | -0.273  | -0.238   | -0.242    |
|        |        |        |        |        |         | 0.736   | 0.0971  | 0.0858  | 0.547   | 0.91    | 0.456   | 0.836   | 0.308  | 0.709   | 0.706   | 0.187   | 0.252    | 0.244     |
|        |        |        |        |        |         | 25      | 25      | 25      | 25      | 25      | 25      | 25      | 25     | 25      | 25      | 25      | 25       | 25        |
| TBP    |        |        |        |        |         |         | -0.0906 | -0.0872 | 0.335   | -0.0224 | -0.0811 | 0.139   | 0.538  | -0.0379 | 0.277   | -0.0273 | -0.0415  | 0.00721   |
|        |        |        |        |        |         |         | 0.667   | 0.679   | 0.102   | 0.915   | 0.7     | 0.509   | 0.0056 | 0.857   | 0.181   | 0.897   | 0.844    | 0.973     |
|        |        |        |        |        |         |         | 25      | 25      | 25      | 25      | 25      | 25      | 25     | 25      | 25      | 25      | 25       | 25        |
| DiBP   |        |        |        |        |         |         |         | 0.44    | 0.153   | 0.0221  | 0.295   | 0.57    | 0.243  | -0.191  | -0.0597 | 0.287   | 0.262    | 0.233     |
|        |        |        |        |        |         |         |         | 0.0279  | 0.465   | 0.917   | 0.152   | 0.003   | 0.241  | 0.36    | 0.777   | 0.164   | 0.206    | 0.263     |
|        |        |        |        |        |         |         |         | 25      | 25      | 25      | 25      | 25      | 25     | 25      | 25      | 25      | 25       | 25        |
| DBP    |        |        |        |        |         |         |         |         | 0.39    | 0.584   | 0.785   | 0.324   | 0.475  | -0.097  | -0.392  | -0.204  | -0.198   | -0.223    |
|        |        |        |        |        |         |         |         |         | 0.0536  | 0.0022  | 3E-06   | 0.114   | 0.0164 | 0.645   | 0.0528  | 0.329   | 0.342    | 0.284     |
|        |        |        |        |        |         |         |         |         | 25      | 25      | 25      | 25      | 25     | 25      | 25      | 25      | 25       | 25        |
| BBP    |        |        |        |        |         |         |         |         |         | 0.508   | 0.14    | 0.264   | 0.387  | -0.139  | 0.0274  | 0.268   | 0.23     | 0.264     |
|        |        |        |        |        |         |         |         |         |         | 0.0095  | 0.504   | 0.203   | 0.0557 | 0.507   | 0.897   | 0.196   | 0.269    | 0.202     |
|        |        |        |        |        |         |         |         |         |         | 25      | 25      | 25      | 25     | 25      | 25      | 25      | 25       | 25        |
| TPP    |        |        |        |        |         |         |         |         |         |         | 0.243   | -0.0287 | 0.263  | 0.0334  | -0.252  | -0.224  | -0.194   | -0.211    |
|        |        |        |        |        |         |         |         |         |         |         | 0.243   | 0.891   | 0.204  | 0.874   | 0.223   | 0.282   | 0.353    | 0.31      |
|        |        |        |        |        |         |         |         |         |         |         | 25      | 25      | 25     | 25      | 25      | 25      | 25       | 25        |
| DEHP   |        |        |        |        |         |         |         |         |         |         |         | 0.402   | 0.303  | -0.067  | -0.306  | -0.225  | -0.19    | -0.192    |
|        |        |        |        |        |         |         |         |         |         |         |         | 0.0463  | 0.141  | 0.75    | 0.136   | 0.28    | 0.362    | 0.358     |
|        |        |        |        |        |         |         |         |         |         |         |         | 25      | 25     | 25      | 25      | 25      | 25       | 25        |
| DiNP   |        |        |        |        |         |         |         |         |         |         |         |         | 0.209  | -0.209  | 0.378   | 0.304   | 0.222    | 0.395     |
|        |        |        |        |        |         |         |         |         |         |         |         |         | 0.315  | 0.317   | 0.0623  | 0.139   | 0.285    | 0.0505    |
|        |        |        |        |        |         |         |         |         |         |         |         |         | 25     | 25      | 25      | 25      | 25       | 25        |
| DEP    |        |        |        |        |         |         |         |         |         |         |         |         |        | -0.126  | 0.148   | 0.0284  | 0.00961  | 0.00088   |
|        |        |        |        |        |         |         |         |         |         |         |         |         |        | 0.548   | 0.479   | 0.893   | 0.964    | 0.997     |
|        |        |        |        |        |         |         |         |         |         |         |         |         |        | 25      | 25      | 25      | 25       | 25        |
| DMP    |        |        |        |        |         |         |         |         |         |         |         |         |        |         | -0.244  | -0.244  | -0.188   | -0.162    |
|        |        |        |        |        |         |         |         |         |         |         |         |         |        |         | 0.24    | 0.239   | 0.367    | 0.44      |
|        |        |        |        |        |         |         |         |         |         |         |         |         |        |         | 25      | 25      | 25       | 25        |
| OA     |        |        |        |        |         |         |         |         |         |         |         |         |        |         |         | 0.458   | 0.323    | 0.546     |
|        |        |        |        |        |         |         |         |         |         |         |         |         |        |         |         | 0.0212  | 0.115    | 0.00476   |
|        |        |        |        |        |         |         |         |         |         |         |         |         |        |         |         | 25      | 25       | 25        |
| PA     |        |        |        |        |         |         |         |         |         |         |         |         |        |         |         |         | 0.961    | 0.896     |
|        |        |        |        |        |         |         |         |         |         |         |         |         |        |         |         |         | 2.63E-14 | 1.49E-09  |
|        |        |        |        |        |         |         |         |         |         |         |         |         |        |         |         |         | 25       | 25        |
| SA     |        |        |        |        |         |         |         |         |         |         |         |         |        |         |         |         |          | 0.841     |
|        |        |        |        |        |         |         |         |         |         |         |         |         |        |         |         |         |          | 1.42E-07  |
|        |        |        |        |        |         |         |         |         |         |         |         |         |        |         |         |         |          | 25        |

**Table S7. Spearman Correlation Analysis between the concentration of several organophosphates, phthalates and fatty acids with PPAR $\gamma$  activation potency in 10 raw dust extracts at 3 different doses (Dose 1: 222  $\mu$ g DEQ/mL; Dose 2: 667  $\mu$ g DEQ/mL; Dose 3: 2000  $\mu$ g DEQ/mL). All the correlation with  $p < 0.05$  was marked in red.**

|        | Dose 2 | Dose 1  | TBP    | DiBP     | DBP    | BBP    | TPP     | DEHP    | DiNP    | DEP     | OA       | PA         | SA       | MA      |
|--------|--------|---------|--------|----------|--------|--------|---------|---------|---------|---------|----------|------------|----------|---------|
| Dose 3 | --     | 0       | 0      | 0        | 0      | 0      | 0       | 0       | 0       | 0       | 0        | 0          | 0        | 0       |
|        | --     | --      | --     | --       | --     | --     | --      | --      | --      | --      | --       | --         | --       | --      |
|        | 0      | 1       | 1      | 1        | 1      | 1      | 1       | 1       | 1       | 1       | 1        | 1          | 1        | 1       |
| Dose 2 |        | 0.873   | 0.0793 | -0.00131 | 0.297  | 0.585  | 0.0407  | 0.334   | 0.148   | -0.132  | 0.896    | 0.873      | 0.88     | 0.778   |
|        |        | 0.00463 | 0.852  | 0.998    | 0.475  | 0.128  | 0.924   | 0.419   | 0.726   | 0.755   | 0.00261  | 0.0046     | 0.00395  | 0.0229  |
|        |        | 8       | 8      | 8        | 8      | 8      | 8       | 8       | 8       | 8       | 8        | 8          | 8        | 8       |
| Dose 1 |        |         | 0.0248 | -0.15    | 0.267  | 0.591  | -0.168  | 0.288   | 0.498   | -0.0783 | 0.922    | 0.934      | 0.966    | 0.831   |
|        |        |         | 0.946  | 0.68     | 0.455  | 0.072  | 0.643   | 0.419   | 0.143   | 0.83    | 0.000149 | 0.0000752  | 5.81E-06 | 0.00288 |
|        |        |         | 10     | 10       | 10     | 10     | 10      | 10      | 10      | 10      | 10       | 10         | 10       | 10      |
| TBP    |        |         |        | 0.0104   | 0.23   | 0.0749 | 0.178   | 0.606   | 0.0158  | -0.285  | -0.0839  | 0.0185     | 0.0553   | -0.131  |
|        |        |         |        | 0.977    | 0.522  | 0.837  | 0.623   | 0.0631  | 0.965   | 0.425   | 0.818    | 0.96       | 0.879    | 0.719   |
|        |        |         |        | 10       | 10     | 10     | 10      | 10      | 10      | 10      | 10       | 10         | 10       | 10      |
| DiBP   |        |         |        |          | -0.249 | -0.222 | -0.0209 | 0.254   | -0.0194 | 0.0742  | -0.105   | -0.178     | -0.168   | -0.356  |
|        |        |         |        |          | 0.488  | 0.537  | 0.954   | 0.478   | 0.958   | 0.839   | 0.773    | 0.624      | 0.643    | 0.313   |
|        |        |         |        |          | 10     | 10     | 10      | 10      | 10      | 10      | 10       | 10         | 10       | 10      |
| DBP    |        |         |        |          |        | 0.786  | 0.1     | -0.174  | -0.0211 | 0.166   | 0.182    | 0.223      | 0.159    | 0.378   |
|        |        |         |        |          |        | 0.007  | 0.783   | 0.63    | 0.954   | 0.646   | 0.615    | 0.535      | 0.66     | 0.282   |
|        |        |         |        |          |        | 10     | 10      | 10      | 10      | 10      | 10       | 10         | 10       | 10      |
| BBP    |        |         |        |          |        |        | -0.165  | -0.0965 | 0.132   | -0.107  | 0.663    | 0.641      | 0.551    | 0.58    |
|        |        |         |        |          |        |        | 0.649   | 0.791   | 0.715   | 0.768   | 0.0368   | 0.0458     | 0.0989   | 0.0786  |
|        |        |         |        |          |        |        | 10      | 10      | 10      | 10      | 10       | 10         | 10       | 10      |
| TPP    |        |         |        |          |        |        |         | 0.308   | -0.252  | 0.773   | -0.172   | -0.122     | -0.0597  | 0.138   |
|        |        |         |        |          |        |        |         | 0.387   | 0.482   | 0.0088  | 0.635    | 0.737      | 0.87     | 0.704   |
|        |        |         |        |          |        |        |         | 10      | 10      | 10      | 10       | 10         | 10       | 10      |
| DEHP   |        |         |        |          |        |        |         |         | 0.163   | 0.117   | 0.227    | 0.347      | 0.387    | 0.194   |
|        |        |         |        |          |        |        |         |         | 0.653   | 0.747   | 0.528    | 0.325      | 0.269    | 0.591   |
|        |        |         |        |          |        |        |         |         | 10      | 10      | 10       | 10         | 10       | 10      |
| DiNP   |        |         |        |          |        |        |         |         |         | -0.0406 | 0.316    | 0.251      | 0.366    | 0.153   |
|        |        |         |        |          |        |        |         |         |         | 0.911   | 0.375    | 0.485      | 0.298    | 0.674   |
|        |        |         |        |          |        |        |         |         |         | 10      | 10       | 10         | 10       | 10      |
| DEP    |        |         |        |          |        |        |         |         |         |         | -0.144   | -0.106     | -0.0713  | 0.259   |
|        |        |         |        |          |        |        |         |         |         |         | 0.691    | 0.771      | 0.845    | 0.469   |
|        |        |         |        |          |        |        |         |         |         |         | 10       | 10         | 10       | 10      |
| OA     |        |         |        |          |        |        |         |         |         |         |          | 0.971      | 0.957    | 0.791   |
|        |        |         |        |          |        |        |         |         |         |         |          | 0.00000287 | 0.000014 | 0.00643 |
|        |        |         |        |          |        |        |         |         |         |         |          | 10         | 10       | 10      |
| PA     |        |         |        |          |        |        |         |         |         |         |          |            | 0.979    | 0.865   |
|        |        |         |        |          |        |        |         |         |         |         |          |            | 8.54E-07 | 0.00123 |
|        |        |         |        |          |        |        |         |         |         |         |          |            | 10       | 10      |
| SA     |        |         |        |          |        |        |         |         |         |         |          |            |          | 0.855   |
|        |        |         |        |          |        |        |         |         |         |         |          |            |          | 0.00161 |
|        |        |         |        |          |        |        |         |         |         |         |          |            |          | 10      |

**Table S8. Concentration ( $\mu\text{g/g}$  dust) of four FAs in cat hair, dog hair, human hair, human skin debris, fish liver oil, and two vegetable oil.**

| Sample            | Concentration ( $\mu\text{g/g}$ ) |        |       |        |         |
|-------------------|-----------------------------------|--------|-------|--------|---------|
|                   | OA                                | PA     | SA    | MA     | Total   |
| Cat Hair          | 41.3                              | 108.6  | 35.8  | 40.6   | 226.2   |
| Dog Hair          | 25.3                              | 86.5   | 29.9  | 44.8   | 186.5   |
| Human Hair        | 331.8                             | 889.1  | 49.3  | 191.1  | 1461.3  |
| Human Skin Debris | 3061.1                            | 9368.1 | 548.9 | 1890.0 | 14868.1 |
| Fish Liver oil    | 1533.5                            | 1445.4 | 172.0 | 257.9  | 3408.8  |
| Vegetable oil1    | 3544.9                            | 1174.2 | 441.2 | 26.1   | 5186.3  |
| Vegetable oil2    | 3262.0                            | 998.0  | 425.7 | 20.5   | 4706.2  |

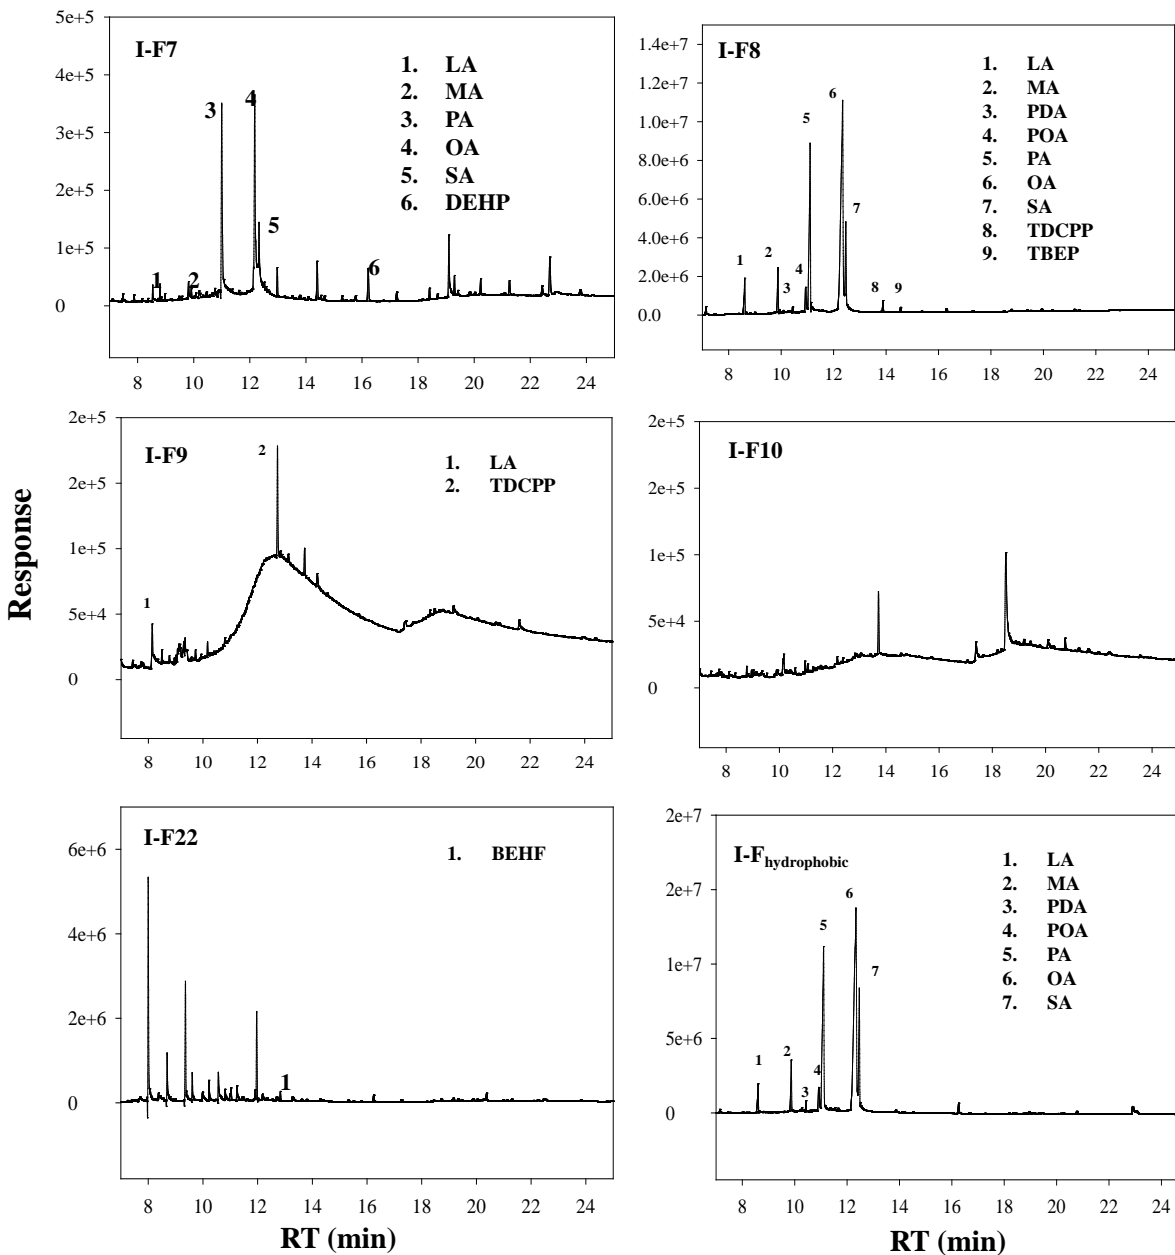

**Figure S1.** Full scan of PPAR $\gamma$  active fractions (F7, F8, F9, F10, and F22, 1.5 min/fraction; I-F<sub>hydrophobic</sub> is the insoluble fraction attached to the vial bottom in methanol:H<sub>2</sub>O (1:1, V/V)) and the identified chemicals in Dust I using GC-MS/EI based on authentic standards or spectral match. See Table 1 for the abbreviation and other information for the chemicals.

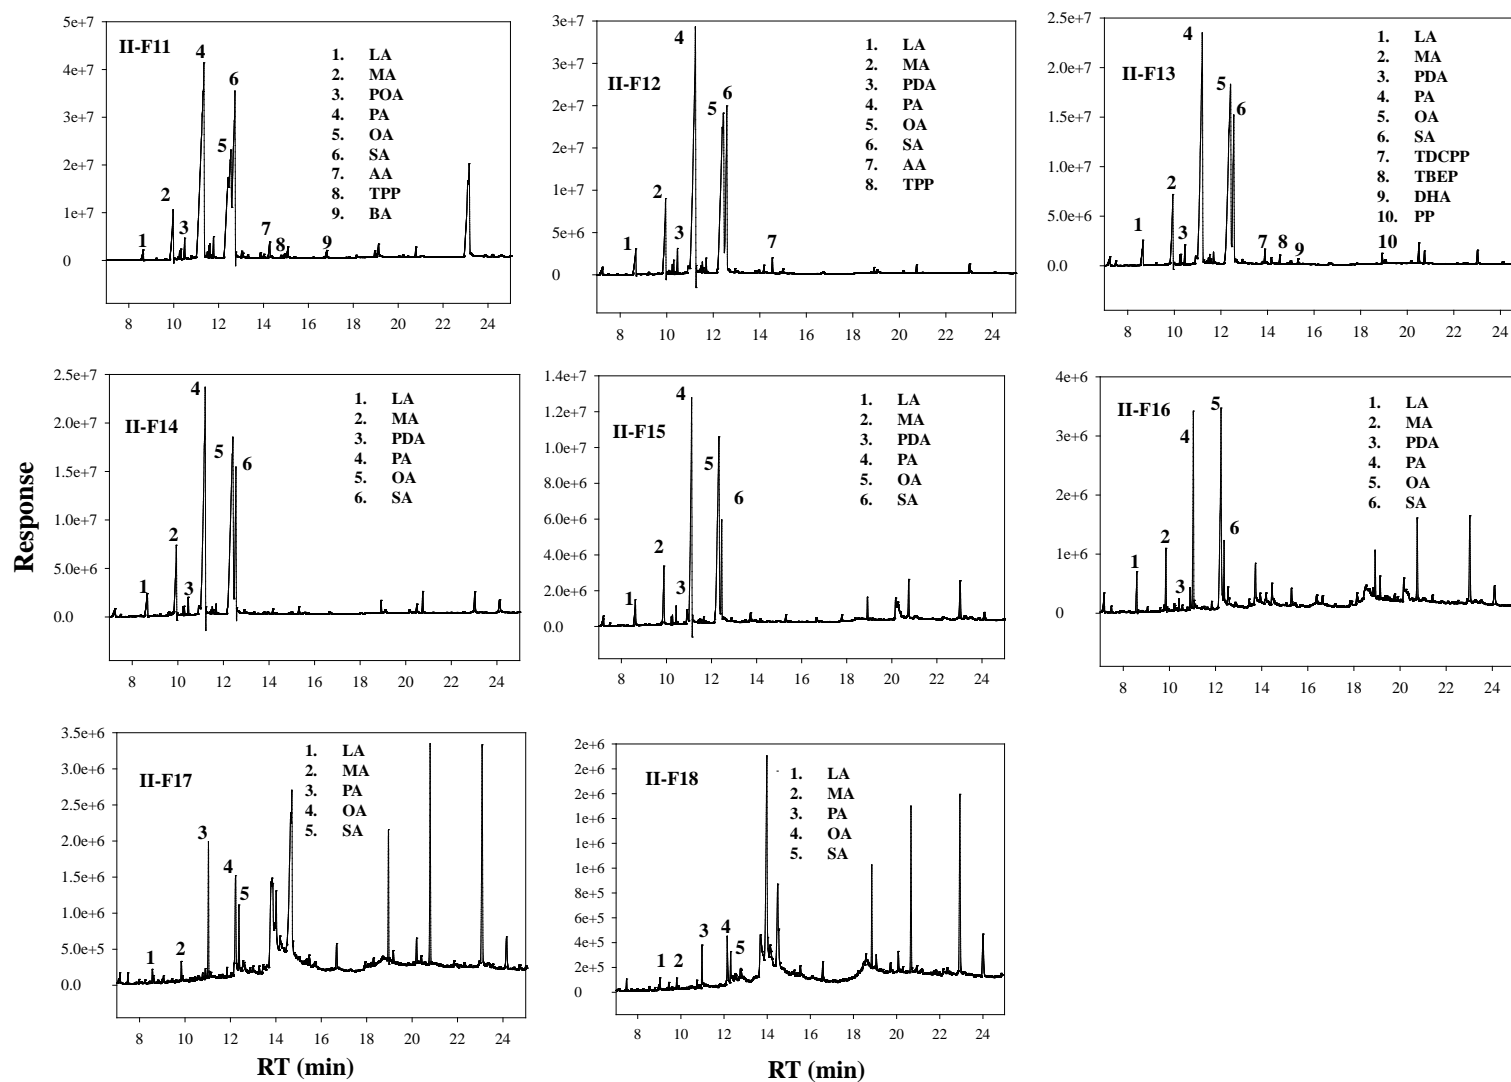

**Figure S2. Full scan of PPAR $\gamma$  active fraction and the identified chemicals in Dust II using GC-MS/EI based on authentic standards or spectral match. See Table 1 for the abbreviation and other information for the chemicals.**

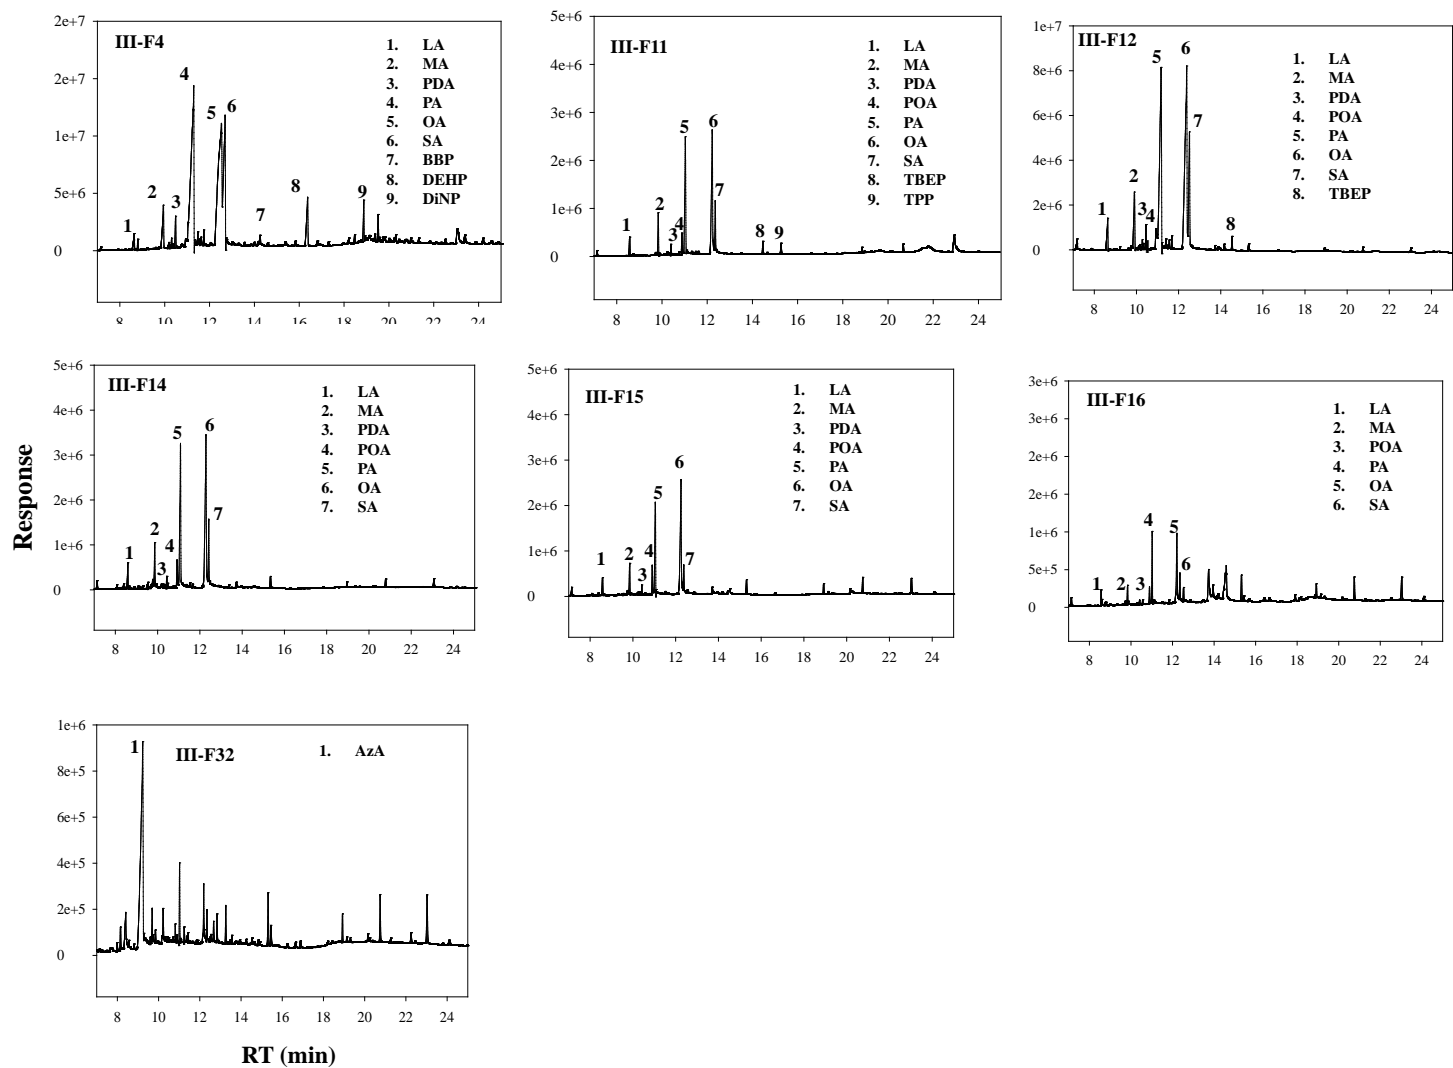

**Figure S3. Full scan of PPAR $\gamma$  active fraction (F4, F11, F12, F14, F15, F16, and F32) and the identified chemicals in Dust III using GC-MS/EI based on authentic standards or spectral match. See Table 1 for the abbreviation and other information for the chemicals.**

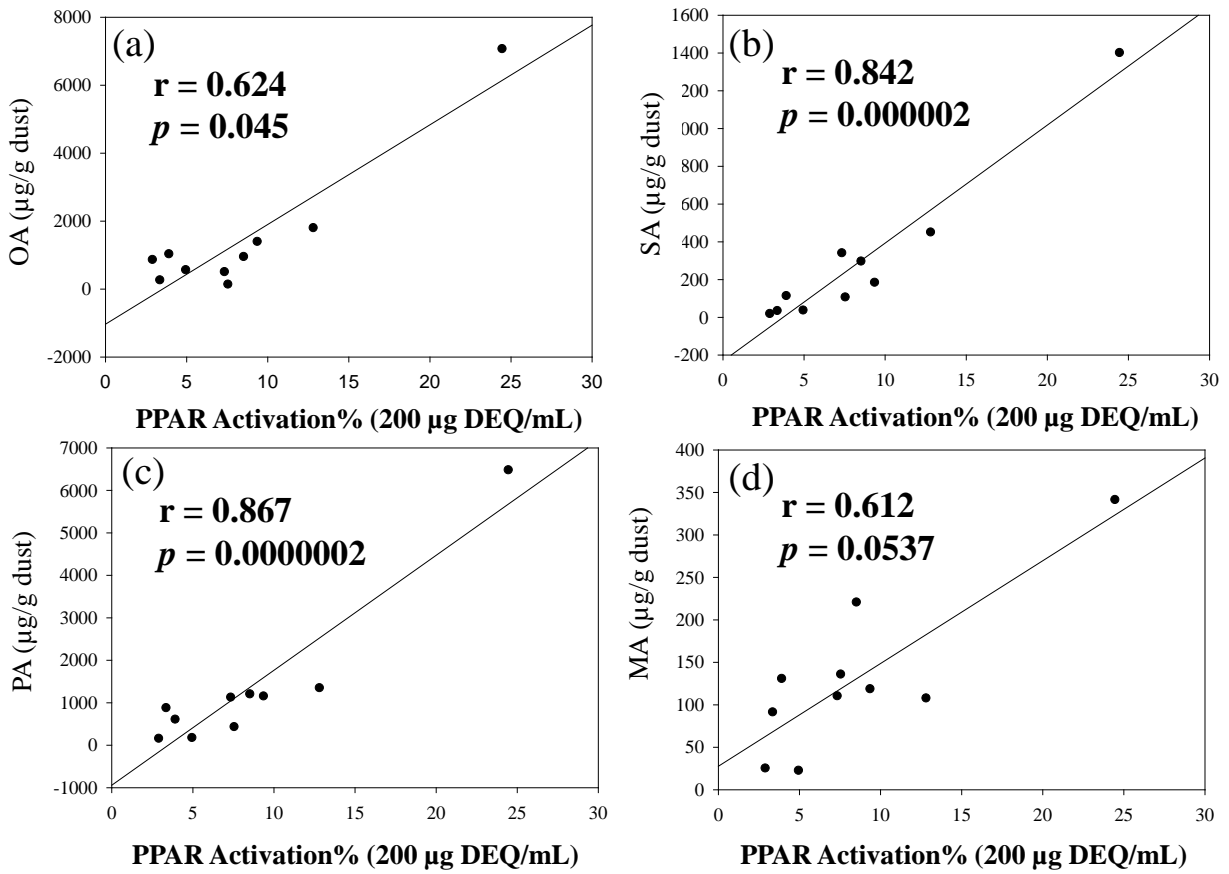

**Figure S4. Linear regression between the PPAR $\gamma$  activation (%) at the dose of 200 µg DEQ/mL and the concentration of (a) OA, (b) PA, (c) SA, and (d) MA in 10 raw dust extracts.**

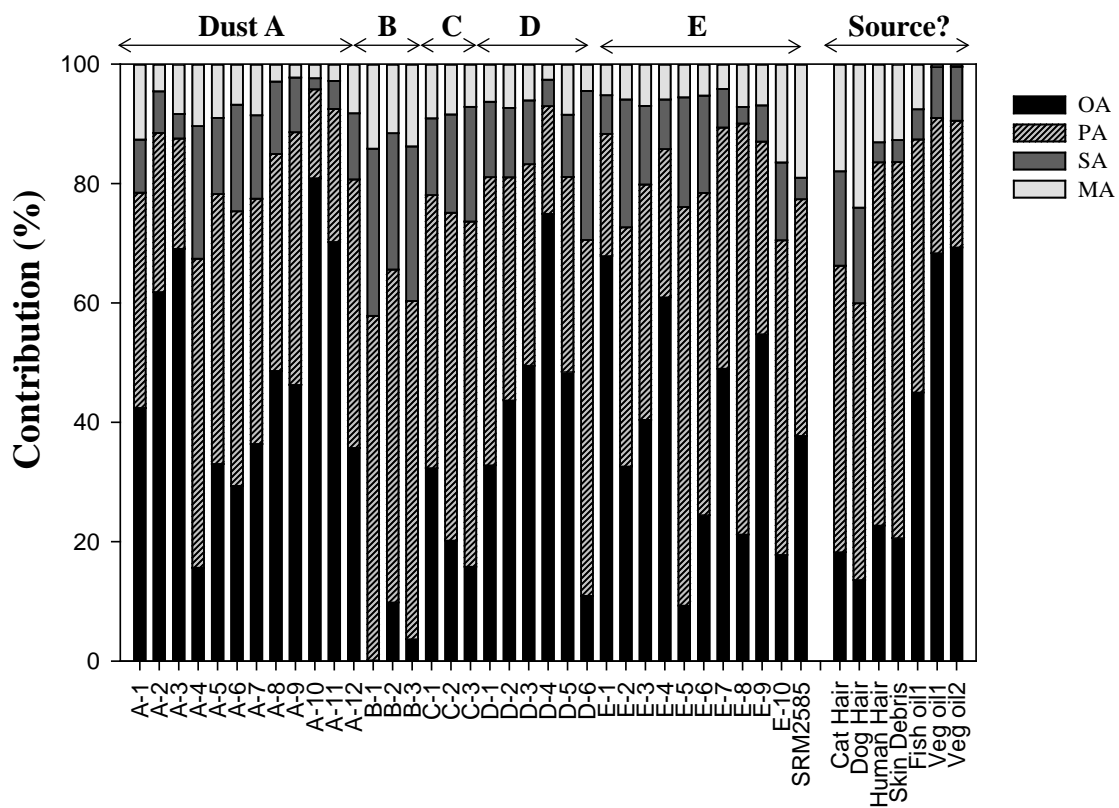

Figure S5. The contribution (%) of OA, PA, SA, and MA to the sum of the FAs in 35 house dust extracts and several possible sources.



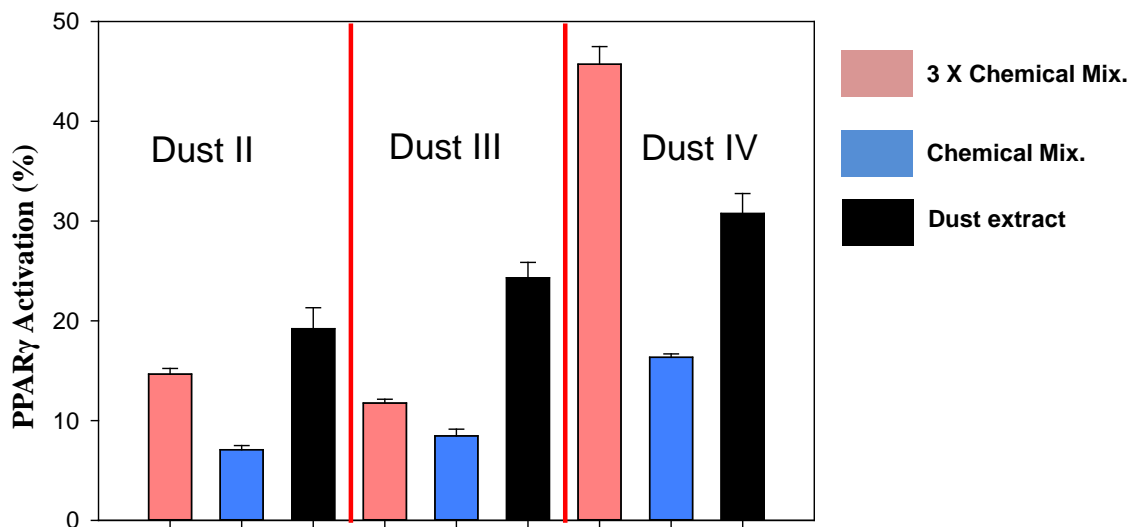

**Figure S6.** PPAR $\gamma$  activation (%) observed in the three dust extracts ( $\sim 606 \mu\text{g DEQ/mL}$ ) and the fatty acid mixture containing equivalent concentrations of OA, PA, SA, and MA. The fatty acid mixture was tested at the median concentration measured in the dust extract and at a concentration equivalent to three times the median concentration. Samples II and III were the dust extracts used in the NP-HPLC fractionation and Sample IV was one of the fresh dust extracts tested.
